# Supplementary material for: Atomic emission spectrometry in liquid electrode plasma using an hourglass microchannel
Source: Royal Society of Chemistry journal article supplement (doi:10.1039/c5ja00059a), 2015-01-01
Supplement: c5ja00059a1.pdf [file c5ja00059a1.pdf]

## Electric supplementary information

### Atomic emission spectrometry in liquid electrode plasma using hourglass microchannel

*Yoshinobu Kohara,<sup>\*a</sup> Yasushi Terui,<sup>b</sup> Megumi Ichikawa,<sup>b</sup> Kazuko Yamamoto,<sup>c</sup> Toshihiro Shirasaki,<sup>c</sup>*

*Kimiyoshi Kohda,<sup>c</sup> Tamotsu Yamamoto,<sup>d</sup> and Yuzuru Takamura<sup>e</sup>*

<sup>a</sup> Hitachi Ltd., Central Research Laboratory, 1-280 Higashi-koigakubo, Kokubunji, Tokyo 185-8601, Japan

<sup>b</sup> Hitachi High-Technologies Corporation, 882 Ichige, Hitachinaka, Ibaraki 312-8504, Japan

<sup>c</sup> Hitachi High-Tech Science Corporation, 1040 Ichige, Hitachinaka, Ibaraki 312-0033, Japan

<sup>d</sup> Micro Emission Ltd., Ishikawa Create Lab, 2-13 Asahidai, Nomi, Ishikawa 923-1211, Japan

<sup>e</sup> School of Material Science, Japan Advanced Institute of Science and Technology, 1-1 Asahi-dai, Nomi, Ishikawa 923-1292, Japan

#### CORRESPONDING AUTHOR FOOTNOTE

E-mail: yoshinobu.kohara.ud@hitachi.com

Tel: +81-42-323-1111

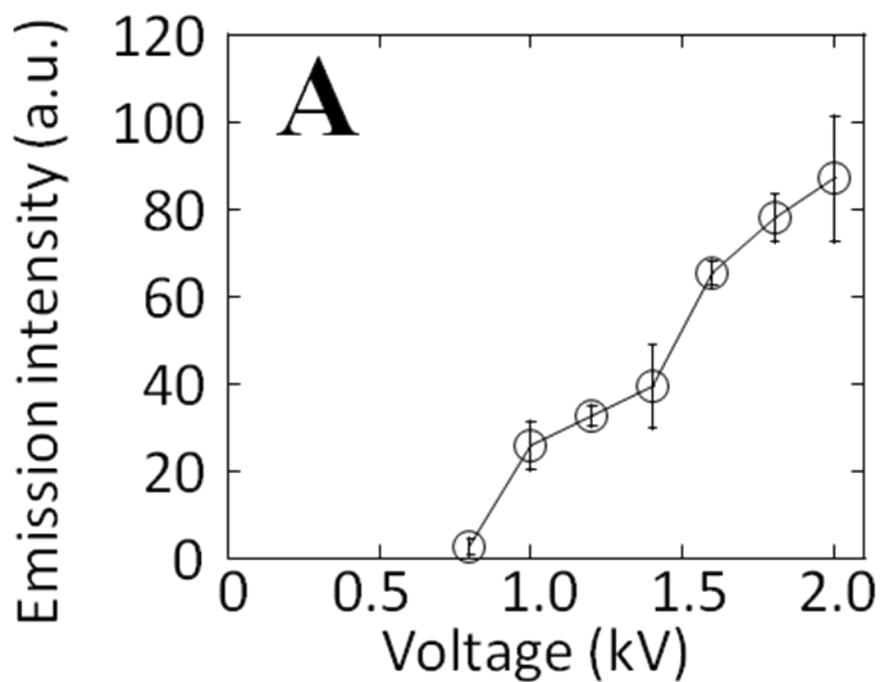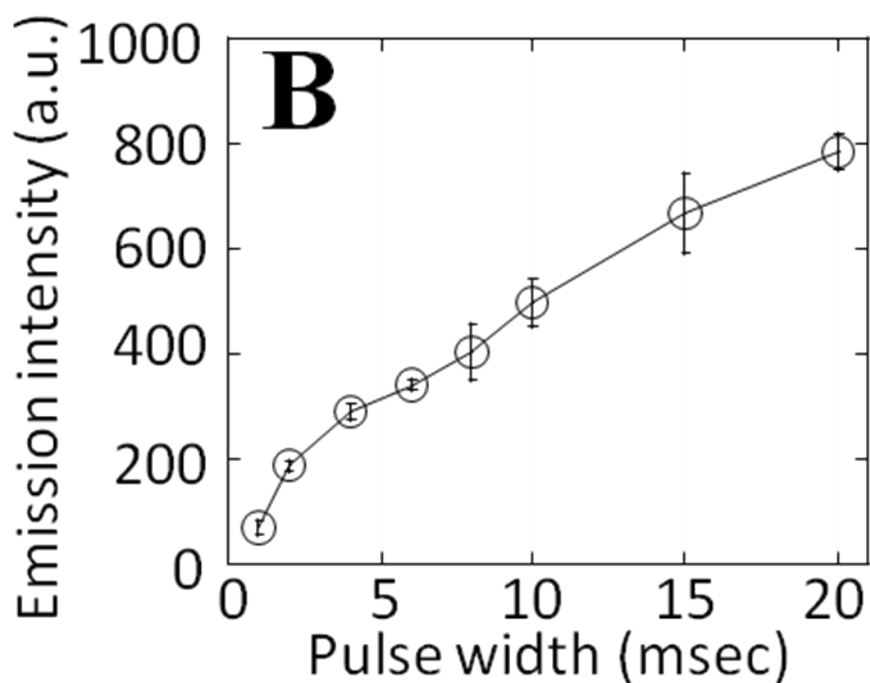

Figure E1. Emission intensity of Pb (405.7 nm). (A) Effect of voltage. Pulse width was 1 msec. (B) Effect of pulse width. Voltage was 1.6 kV. Concentration of Pb was 100 ppm and solution was 0.1 N acetic acid. Emission intensity was averaged over 9 pulses and  $N = 3$  for each point.

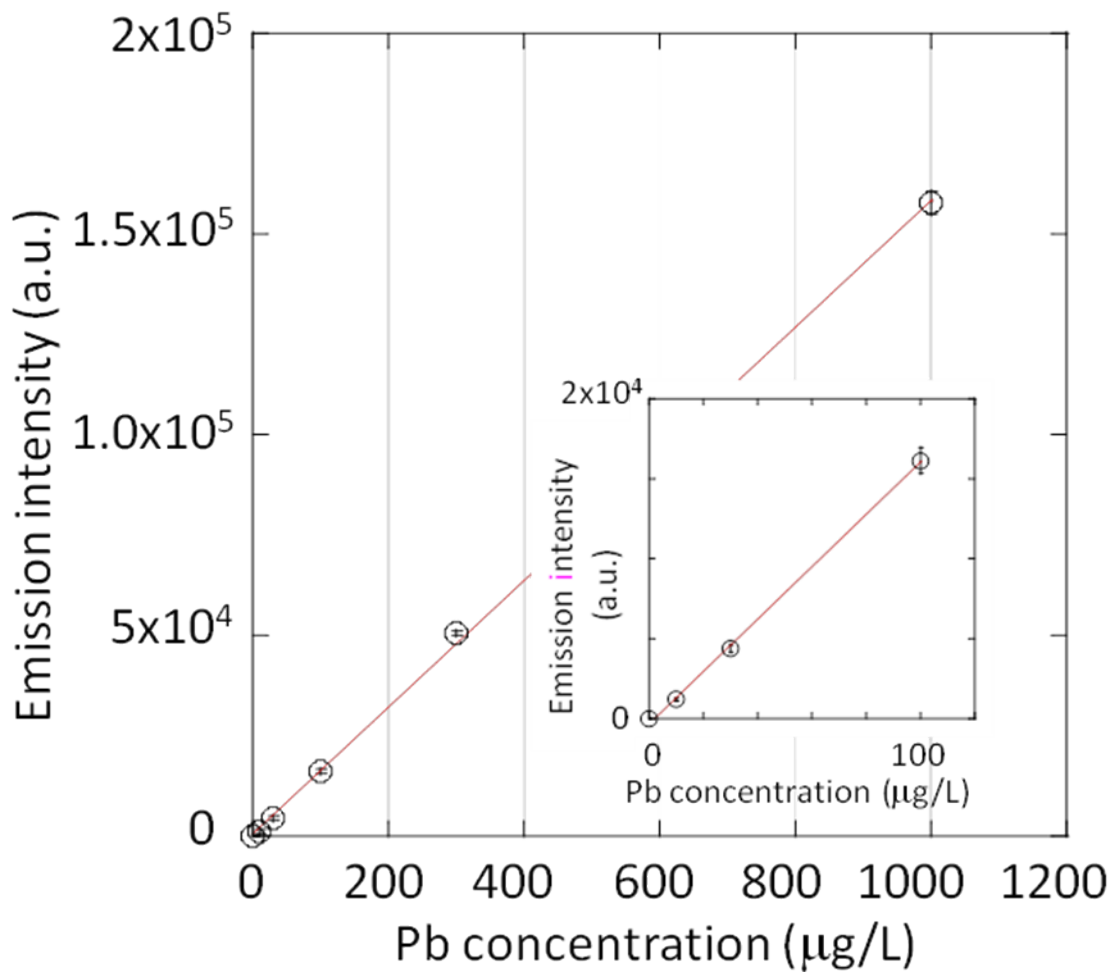

Figure E2. Calibration curve of Pb concentration and emission intensity (405.7 nm). An enlarged view in the lower concentration region is shown inside the graph. Solution was 0.1 N acetic acid. The electrical condition was 1.6kV-20msec. Emission intensity was accumulated for 200 pulses. N = 3 for each concentration.
